# Supplementary material
Source: PubMed Central journal article supplement (PMC4770544)
Supplement: NIHMS759009-supplement-Supplemental_Material.pdf [file NIHMS759009-supplement-Supplemental_Material.pdf]

**SUPPLEMENTAL MATERIAL**

## **APPENDIX:**

### **IPAC Investigators**

*University of Pittsburgh Medical Center (10)* Dennis M McNamara, MD; James D. Fett, MD; Jessica Pisarcik, RN, BSN; Charles McTiernan, PhD; Karen Hanley-Yanez, BS; John Gorcsan III, MD; Erik Schelbert, MD. *Intermountain Medical Center (8)* Rami Alharethi, MD; Kismet Rasmusson, CRNP; Kim Brunisholz; Amy Butler, BS, CCRP; Deborah Budge; A.G. Kfoury, MD; Benjamin Horne, PhD; Joe Tuinei; Heather Brown. *Vanderbilt University (7)* Julie Damp, MD; Allen J. Naftilan, MD; Jill Russell, RN, MSN; Darla Freehardt, LPN, BS, CCRP. *Cleveland Clinic (7)* Eileen Hsich, MD; Cynthia Oblak, CCRC. *Washington University, St. Louis (6)* Greg Ewald, MD; Donna Whitehead, RN; Jean Flanagan, RN; Anne Platts. *University of Southern California (6)* Uri Elkayam, MD; Jorge Caro, MPH; Stephanie Mullin, RN. *Brigham and Women's Hospital (5)* Michael M. Givertz, MD; M. Susan Anello, RN, BS. *University of Kentucky (5)* Navin Rajagopalan, MD; David Booth, MD; Tiffany Sandlin, RN; Wendy Wijesiri, RN. *Mayo Clinic (4)* Leslie T. Cooper, MD; Lori A. Blauwet, MD; Joann Brunner, RN; Mary Phelps; Ruth Kempf. *Louisiana State University (4)* Kalgi Modi, MD; Tracy Norwood. *University of Illinois (4)* Joan Brilller, MD; Decebal Sorin Griza, MD. *Duke University (4)* G. Michael Felker, MD; Robb Kociol, MD; Patricia Adams, RN. *Wake Forest (4)* Gretchen Wells, MD; Vinay Thohan, MD; Deborah Wesley-Farrington, RN, BSN, CCRC, CCA; Sandra Soots, RN, CCRC. *Jewish General (3)* Richard Sheppard, MD; Caroline Michel, MD; Nathalie Lapointe, RN, PhD; Heather Nathaniel. *University of Calgary (3)* Angela Kealey, MD. *Massachusetts General (2)* Marc Semigran, MD; Maureen Daher, RN. *Penn State Milton S. Hershey Medical Center (2)* John Boehmer, MD; David Silber, MD; Eric Popjes, MD; Patricia Frey, RN; Todd Nicklas, RN. *University of Rochester (2)* Jeffrey Alexis, MD; Lori Caufield, RN, BSN, CCRC. *Georgia Health Sciences University (2)* John W. Thornton III, MD; Mindy Gentry, MD; Vincent J.B. Robinson, MBBS; Gyanendra K. Sharma, MD; Joan Holloway, BS; Maria Powell, LPN, CCRC. *University of Texas, Southwestern (2)* David Markham, MD; Mark Drazner, MD; Lynn Fernandez, RN. *Newark Beth Israel Medical Center (2)* Mark Zucker, MD; David A. Baran, MD; Martin L. Gimovsky, MD; Natalia Hochbaum, MD; Bharati Patel, RN,

CCRC; Laura Adams, RN, BSN. *University of Maryland (2)* Gautam Ramani, MD; Stephen Gottlieb, MD; Shawn Robinson, MD; Stacy Fisher, MD; Joanne Marshall, BSN, MS. *Columbia University (2)* Jennifer Haythe, MD; Donna Mancini, MD; Rachel Bijou, MD; Maryjane Farr, MD; Marybeth Marks, Henry Arango. *Baylor College (2)* Biykem Bozkurt, MD, PhD, FACC, FAHA; Mariana Bolos. *Thomas Jefferson (1)* Paul Mather, MD; Sharon Rubin, MD; Raphael Bonita, MD; Susan Eberwine, RN. *Stony Brook University Medical Center (1)* Hal Skopicki, MD, PhD; Kathleen Stergiopoulos, MD; Ellen McCathy-Santoro, MD; Jennifer Intravaia, RN, CCRCII; Elizabeth Maas. *Morristown Hospital (0)* Jordan Safirstein, MD; Audrey Kleet, RN, MS, ACNP-BC, CCRN, CCTC; Nancy Martinez, RN; Christine Corpoin, RN; Donna Hesari, RN. *University of Miami (0)* Sandra Chaparro, MD; Laura J. Hudson, MA, MPH, CCRC. *Harper University Hospital (0)* Jalal K. Ghali, MD; Zora Injic, RN, BSc, MSA. *Johns Hopkins Hospital (0)* Ilan S. Wittstein, MD.
